# Supplementary material
Source: HighWire-hosted journal article supplement (https://ez-admanager.com/highwire/filestream/161070/field_highwire_adjunct_files/0/Lacuey_701.pdf)
Supplement: Lacuey_701.pdf [file Lacuey_701.pdf]

# 扁桃体と海馬は中枢性無呼吸てんかん発作の症候原性領域である

Amygdala and hippocampus are symptomatogenic zones for central apneic seizures

Nuria Lacuey, MD\*, \*\*, \*\*\*;  
Bilal Zonjy, MD\*;  
Luisa Londono, MD\*;  
Samden D. Lhatoo, MD\*

\*Epilepsy Center, UH  
Cleveland Medical  
Center, Cleveland, OH  
\*\*Department of  
Neurology, Vall d'Hebron  
University Hospital

\*\*\*Department of Medicine,  
Universitat Autònoma de  
Barcelona, Spain

Correspondence to  
Dr. Lacuey:  
nuria.lacuey@uhhospitals.org

**目的：**ヒトの脳における辺縁系の呼吸調節領域、さらには中枢性無呼吸の症候原性領域 (symptomatogenic zone) を同定する。

**方法：**解剖学的に正確に留置した定位脳波電極を直接刺激し、呼吸反応を解析した。定位的深部電極を留置した患者3例を前向きに検討した。扁桃体、海馬、辺縁系外領域 (眼窩前頭野、側頭極、側頭葉新皮質) において検討した。

**結果：**扁桃体および海馬頭部をそれぞれ刺激することにより、呼気相における中枢性無呼吸が一貫して引き起こされ、海馬に限局したてんかん発作でも同様に無呼吸がみられた。

**結論：**本研究の所見から、海馬と扁桃体がヒトの辺縁系の呼吸調節領域であり、中枢性無呼吸てんかん発作の症候原性領域 (symptomatogenic zone) でもあることが確認された。

Neurology® 2017; 88: 701-705

図1 海馬および扁桃体の刺激後の無呼吸

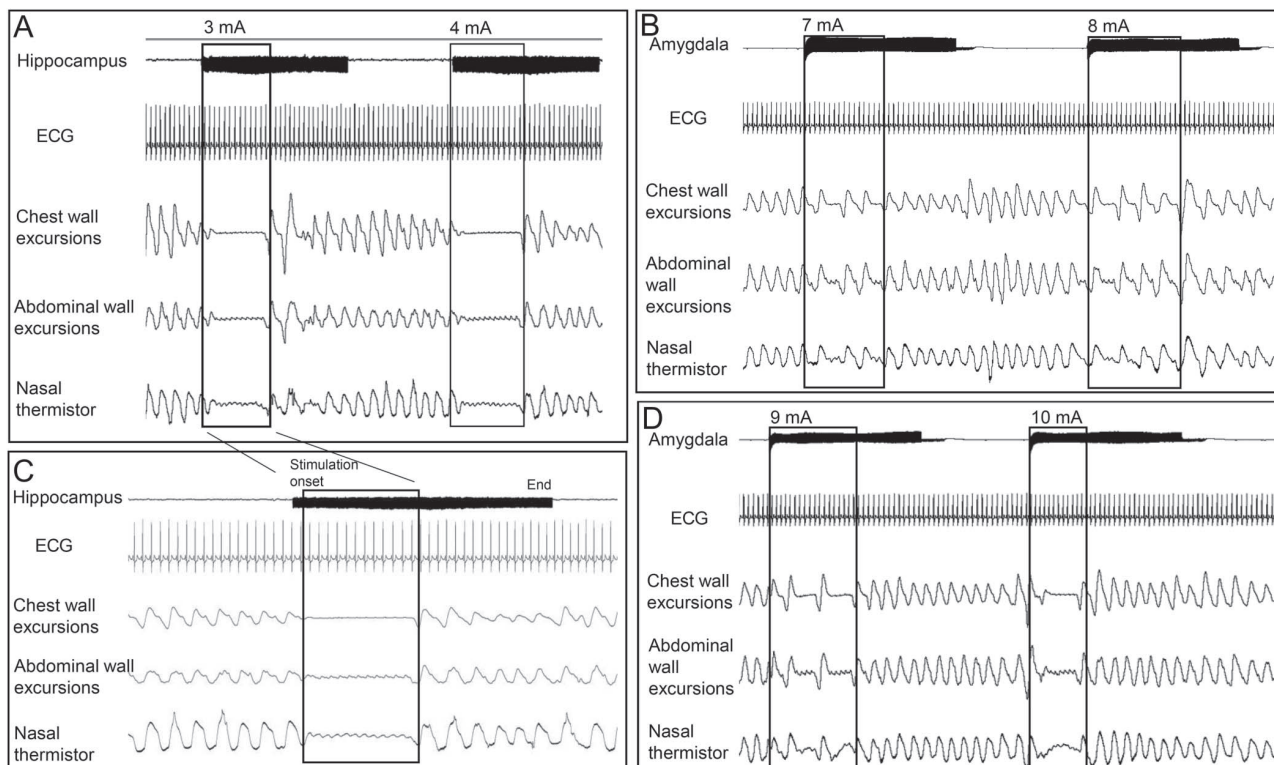

(A) 患者2では、海馬頭部への3mAおよび4mAの電気刺激により、即時に中枢性無呼吸が引き起こされた。無呼吸は刺激が終了する前に終了した。(C) 患者2における海馬頭部に対する3mAの電気刺激で生じた無呼吸。(B, D) 患者2では、7、8、9mAの電気刺激により、即時に呼吸リズムの変化が引き起こされた。同じ患者では、10mAの電気刺激により中枢性無呼吸が引き起こされた。

図2 扁桃体の刺激と海馬に局限したてんかん発作で引き起こされた無呼吸

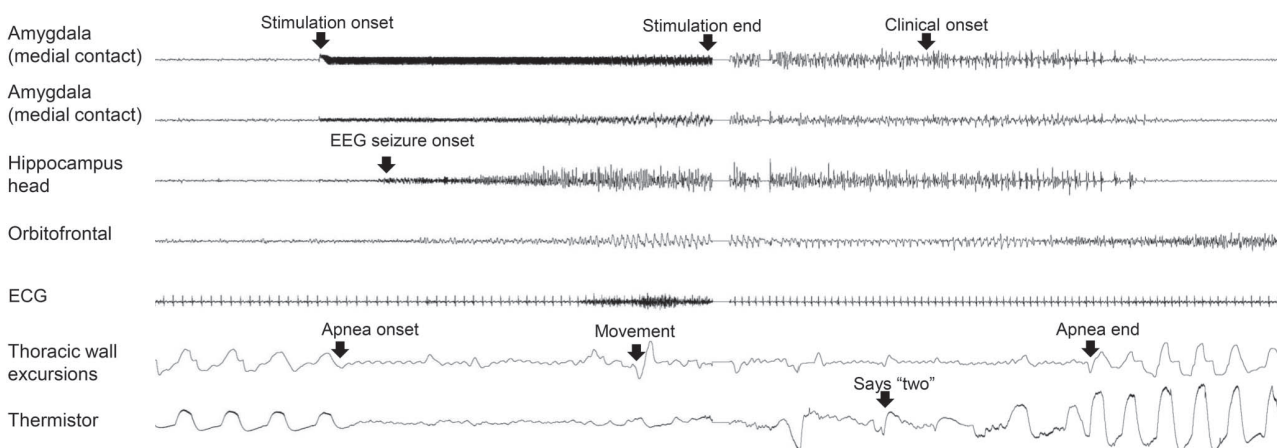

患者1では、扁桃体の刺激により、即時に無呼吸が引き起こされた。無呼吸の開始から3秒後に海馬てんかん発作がみられた。海馬と扁桃体での発作終了時に呼吸は再開したが、眼窩前頭皮質ではその後数秒間発作時脳波変化が持続した。
